# Supplementary material for: Impact of oral hygiene habits on oral health-related quality of life of in-school adolescents in Ibadan, Nigeria
Source: Frontiers journal article supplement (doi:10.3389/froh.2022.979674), 2022-09-09
Supplement: Data_Sheet_1.PDF [file Data_Sheet_1.PDF]

## Questionnaire

Dear student,

This questionnaire is designed to assess your oral hygiene habits and oral health related quality of life. Your honest answers will be treated with upmost confidentiality. Thank you.

### **Sociodemographic characteristics. Please fill / tick as appropriate**

1. Age as at last birthday -----years
2. Gender                                      1) Male                                      2) Female
3. Father's Occupation-----
4. Mother's occupation-----

### **Oral hygiene habits: Please tick as appropriate.**

5. How many times do you clean your teeth?    1) None                                      2) once                                      3) twice or more  
4) not everyday
6. How many times do you clean your teeth?    1) None                                      2) once  
before breakfast                                      3) twice before breakfast and dinner                                      4) after each  
meal                                      5) after breakfast and dinner                                      6) before  
breakfast and after dinner                                      7) others -----
7. What do you use mainly to clean your teeth?    1) chewing stick                                      2) toothbrush  
3) cotton wool                                      4) nothing                                      5) others -----
8. What kind of toothbrush do you use?    1) Soft                                      2) medium                                      3) hard  
4) very hard                                      5) don't know
9. How many minutes to you spend cleaning your teeth?    1) < 1 minute    2) 1 minute    3) 2  
minutes                                      4) 3 minutes or more                                      4) don't know
10. Do you clean between your teeth?    1) Yes                                      2) No
11. What do use to clean between your teeth?    1) toothpicks 2) broom sticks 3) blade 4)  
dental floss 5) interdental brush 6) others please specify -----
12. When do you change your toothbrush?    1) less than 3months    2) 3months                                      3)  
more than 3months    4) when bristles are fraying    5) one year or more than one year
13. Have you been to the dentist before?    1) Yes                                      2) No

### **Oral-health-related-quality-of-life ; Please tick as appropriate**

14. How would you rate the present condition of your mouth and teeth?

a) Very bad   b) bad   c) I don't know   d) Good   e) Very good

In the last three months: How often have you

|                                                                               | Almost all<br>of the time | Fairly<br>often | Sometimes | Almost<br>never | Never” |
|-------------------------------------------------------------------------------|---------------------------|-----------------|-----------|-----------------|--------|
| Had pain in your teeth/toothache                                              |                           |                 |           |                 |        |
| Had discoloured teeth or spots on your teeth                                  |                           |                 |           |                 |        |
| Had crooked teeth or spaces between your teeth                                |                           |                 |           |                 |        |
| Had bad breath                                                                |                           |                 |           |                 |        |
| Had bleeding gums                                                             |                           |                 |           |                 |        |
| Had difficulty eating foods you would like to eat                             |                           |                 |           |                 |        |
| Had trouble sleeping                                                          |                           |                 |           |                 |        |
| Had difficulty saying certain words                                           |                           |                 |           |                 |        |
| Had difficulty keeping your teeth clean                                       |                           |                 |           |                 |        |
| Been unhappy or sad                                                           |                           |                 |           |                 |        |
| Felt worried or anxious                                                       |                           |                 |           |                 |        |
| Avoided smiling or laughing with other children                               |                           |                 |           |                 |        |
| Felt that you look different                                                  |                           |                 |           |                 |        |
| Been worried about what other people think about your teeth/mouth             |                           |                 |           |                 |        |
| Been teased, bullied, or called names by other children because of your teeth |                           |                 |           |                 |        |
| Missed school for any reason because of your teeth/mouth                      |                           |                 |           |                 |        |
| Not wanted to speak/read out loud in class because of your teeth /mouth       |                           |                 |           |                 |        |
| Been confident                                                                |                           |                 |           |                 |        |
| Felt that you were attractive (good looking)                                  |                           |                 |           |                 |        |
